# Supplementary material for: Thermo-sensitive poly(VCL-4VP-NVP) ionic microgels: synthesis, cytotoxicity, hemocompatibility, and sustained release of anti-inflammatory drugs
Source: Royal Society of Chemistry journal article supplement (doi:10.1039/c6qm00046k), 2016-08-15
Supplement: c6qm00046k1.pdf [file c6qm00046k1.pdf]

## Supporting Information

### **Thermo-sensitive Poly(VCL-4VP-NVP) Ionic Microgels: Synthesis, Cytotoxicity, Hemocompatibility, and Sustained Release of Anti- inflammatory Drug**

**Xianjing Zhou,<sup>†</sup> Qing Yang,<sup>†</sup> Jianyuan Li,<sup>†</sup> Jingjing Nie,<sup>‡</sup> Guping Tang,<sup>‡</sup> Binyang Du<sup>†\*</sup>**

<sup>†</sup>MOE Key Laboratory of Macromolecular Synthesis and Functionalization, Department of Polymer  
Science & Engineering, Zhejiang University, Hangzhou 310027, China

<sup>‡</sup>Department of Chemistry, Zhejiang University, Hangzhou 310027, China

---

\*Corresponding author. E-mail: [duby@zju.edu.cn](mailto:duby@zju.edu.cn)

Guinier -type plots of  $\text{Ln}I(q)^{-1} \sim q^2$  are shown in Figure S1 for the SLS data of poly(VCL-4VP-NVP) microgels, where  $I$  is the scattering intensity and  $q = (4\pi n/\lambda) \sin(\theta/2)$ , with  $\lambda$ ,  $n$ , and  $\theta$  being the wavelength of the laser light in vacuum (here  $\lambda = 637$  nm), the refractive index of solvent, and the scattering angle, respectively.  $\langle R_g \rangle$  could be then calculated from the slope of  $\text{Ln}I(q)^{-1} \sim q^2$  via the equation given as:

$$\text{Ln}I(q)^{-1} = \text{Ln}I(0)^{-1} + \frac{\langle R_g \rangle^2}{3} q^2 \quad (\text{S1})$$

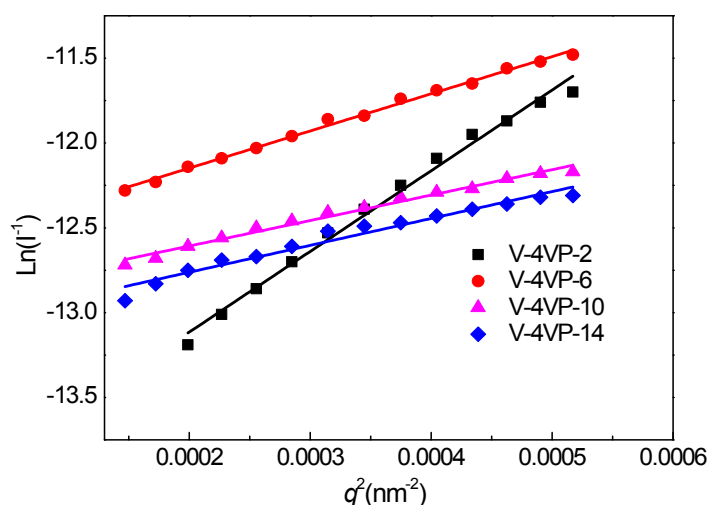

**Fig. S1** The SLS data of the V-4VP-2 (■), V-4VP-6 (●), V-4VP-10 (▲), V-4VP-14 (◆) microgels. The solid lines are fits with Guinier equation (S1).

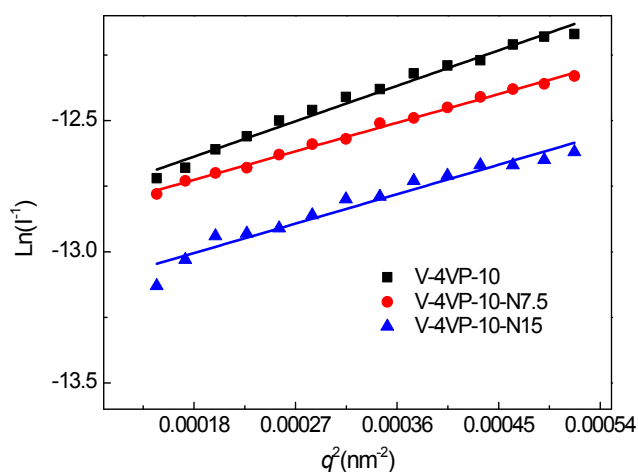

**Fig. S2** The SLS data of the V-4VP-10(■), V-4VP-10-N7.5 (●), V-4VP-10-N15 (▲) microgels. The solid lines are fits with Guinier equation (S1).

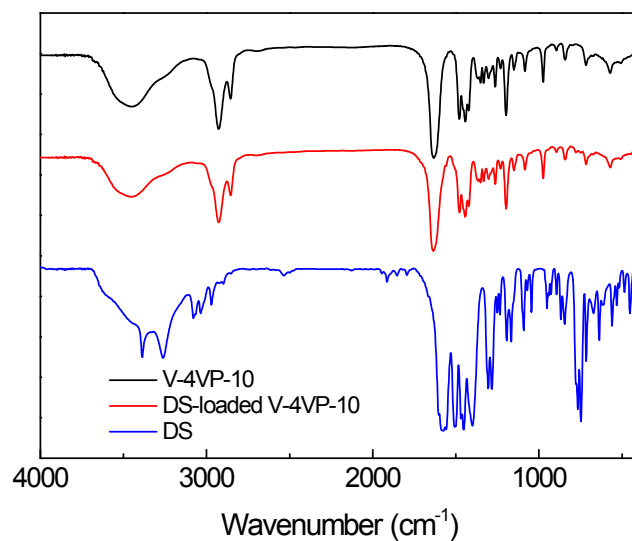

**Fig. S3** The FTIR spectra of V-4VP-10 microgels, DS, and DS-loaded V-4VP-10 microgels.

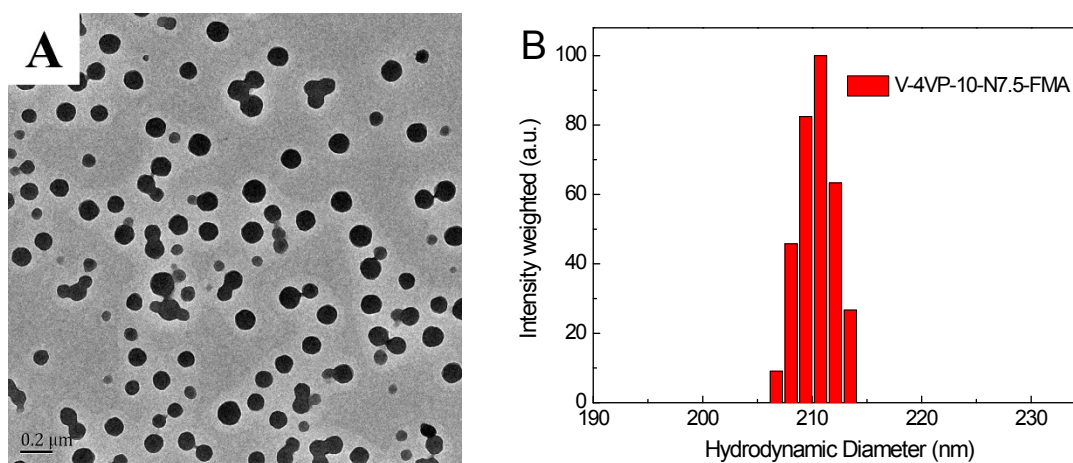

**Fig. S4** The representative TEM image (A) and corresponding distribution of hydrodynamic diameter (B) of the fluorescent V-4VP-10-N7.5-FMA microgels.

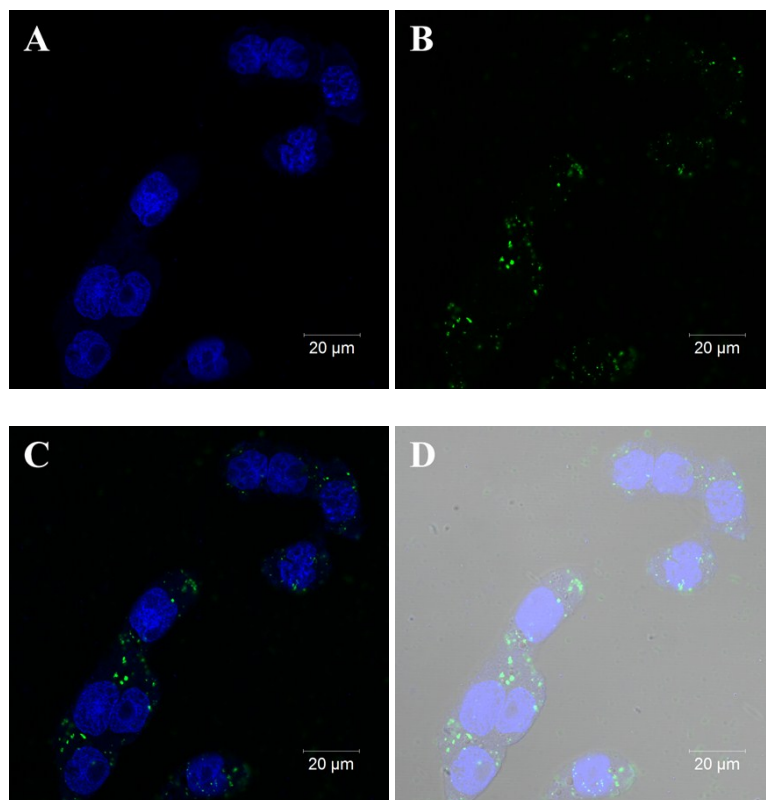

**Fig. S5** CLSM fluorescent images of HEK-293 cells incubated with 10  $\mu\text{g}/\text{mL}$  of V-4VP-10-N7.5-FMA microgels loaded with DS drugs, named as V-4VP-10-N7.5-FMA-DS, for 4 h. (A) The blue image of nucleus of HEK-293 cell stained with DAPI, (B) the green image of V-4VP-10-N7.5-FMA-DS microgels labeled with FAM, (C) the overlapping fluorescent image of HEK-293 cell nucleus and V-4VP-10-N7.5-FMA-DS microgels, and (D) the constructive image by further overlapping (C) with the normal optical image of HEK-293 cells.
